# Supplementary material
Source: PubMed Central journal article supplement (PMC3226770)
Supplement: NIHMS328475-supplement-1.pdf [file NIHMS328475-supplement-1.pdf]

# Supplementary Information

## Repression of the DNA-binding inhibitor Id3 by Blimp1 limits CD8<sup>+</sup> T cell memory formation

Yun Ji<sup>1</sup>, Zoltan Pos<sup>2,3</sup>, Mahadev Rao<sup>1</sup>, Christopher A. Klebanoff<sup>1</sup>, Zhiya Yu<sup>1</sup>,  
Madhusudhanan Sukumar<sup>1</sup>, Robert N. Reger<sup>1</sup>, Douglas C. Palmer<sup>1</sup>, Zachary A. Borman<sup>1</sup>,  
Pawel Muranski<sup>1</sup>, Ena Wang<sup>2,3</sup>, David S. Schrupp<sup>1</sup>, Francesco M. Marincola<sup>2,3</sup>, Nicholas  
P. Restifo<sup>1</sup>, Luca Gattinoni<sup>1</sup>

<sup>1</sup>*Center for Cancer Research, National Cancer Institute, National Institutes of Health, Bethesda, Maryland, USA.*

<sup>2</sup>*Infectious Disease and Immunogenetics Section, Department of Transfusion Medicine, Clinical Center, National Institutes of Health, Bethesda, Maryland, USA.*

<sup>3</sup>*Center for Human Immunology, National Institutes of Health, Bethesda, Maryland, USA.*

Correspondence should be addressed to N.P.R. ([restifo@nih.gov](mailto:restifo@nih.gov)) or L.G. ([gattinol@mail.nih.gov](mailto:gattinol@mail.nih.gov))

# Supplementary Fig. 1

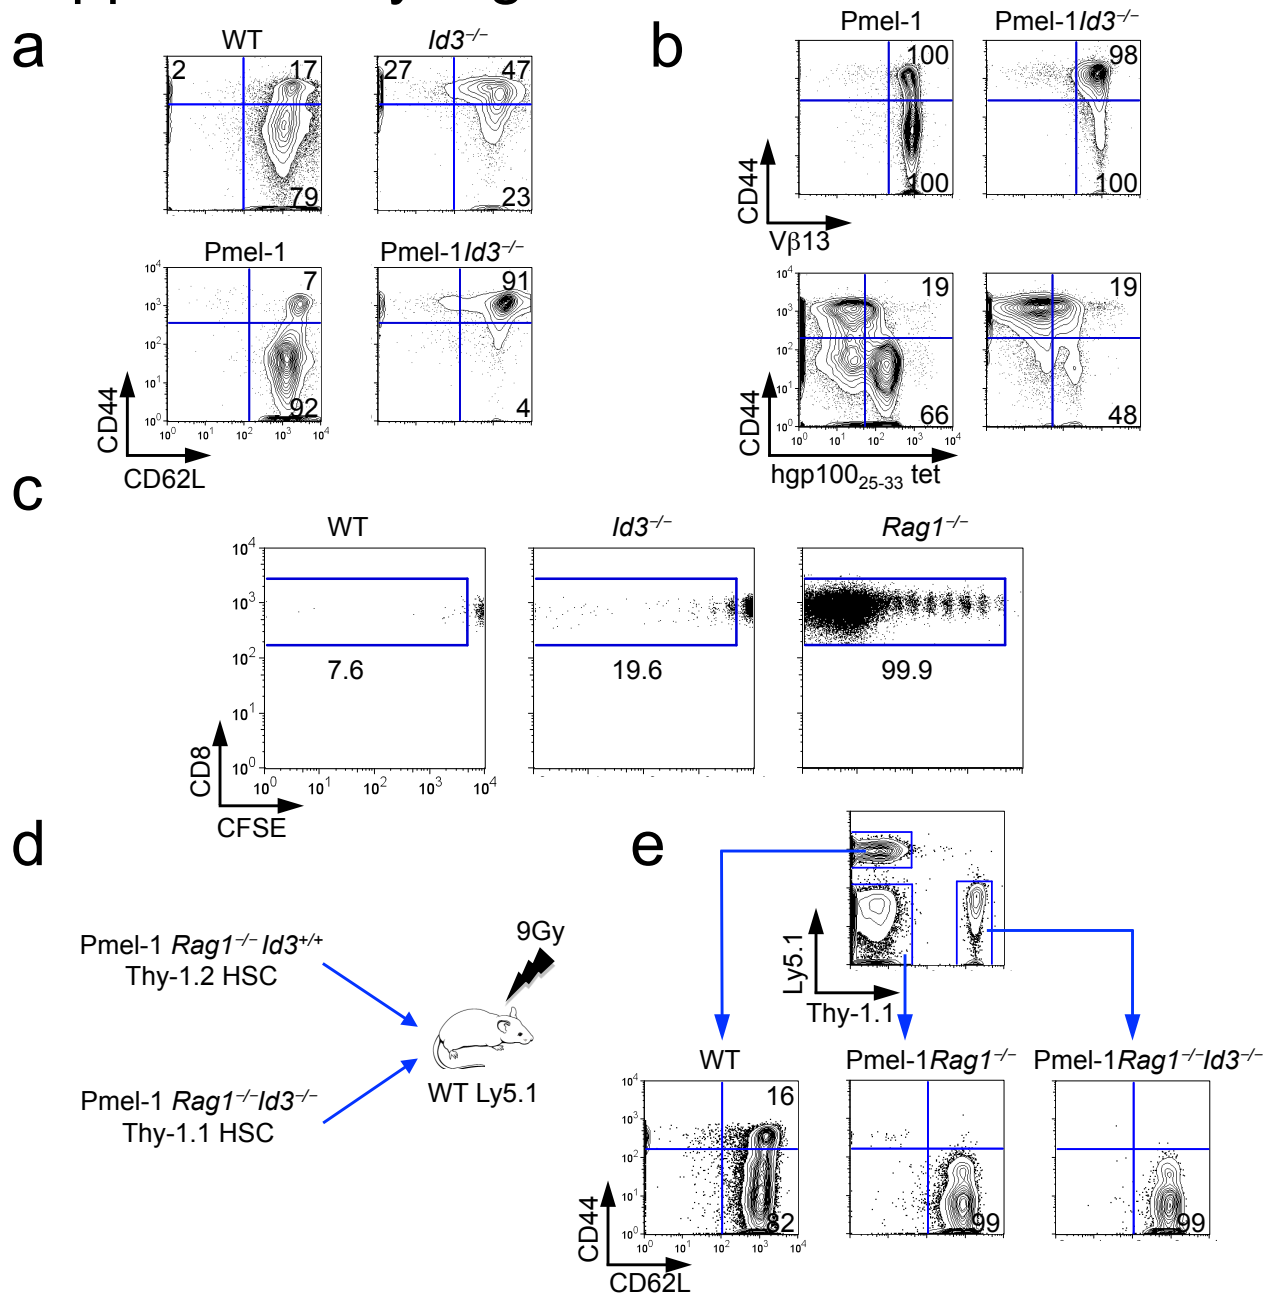

**Supplementary Figure 1. The activated phenotype of *Id3*<sup>-/-</sup> CD8<sup>+</sup> T cells is not CD8<sup>+</sup> T cell intrinsic. (a)** Representative flow cytometry analysis of *Id3*<sup>-/-</sup> CD8<sup>+</sup> T cells from WT as well as from pmel-1 mice. Contour plots show CD44 and CD62L expression after gating on CD8<sup>+</sup> cells. **(b)** Representative flow cytometry analysis of the Vβ13 (upper panel) and hgp100<sub>25-33</sub> tetramer (lower panel) binding efficiency of pmel-1 and pmel-1 *Id3*<sup>-/-</sup> CD8<sup>+</sup> T cells. Contour plots show CD44 and Vβ13 expression and hgp100<sub>25-33</sub> tetramer binding efficiency after gating on CD8<sup>+</sup> cells. Numbers indicate the percentage of Vβ13<sup>+</sup> or tet<sup>+</sup> cells relative to CD44 high or low cells. **(c)** Representative flow cytometry analysis of CFSE dilution profiles of adoptively transferred CFSE-labeled Ly5.1CD8<sup>+</sup> T cells into wild type, *Id3*<sup>-/-</sup>, and *Rag1*<sup>-/-</sup> hosts 5 weeks after transfer. **(d)** Generation of bone marrow chimeras. Hematopoietic stem cells (HSC) from pmel-1 *Rag1*<sup>-/-</sup> *Id3*<sup>-/-</sup> Thy-1.1 and pmel-1 *Rag1*<sup>-/-</sup> Thy-1.2 mice were adoptively transferred into 9 Gy irradiated wild type Ly5.1 host at 1: 1 ratio. Eight weeks later CD8<sup>+</sup> T cells from the host were analyzed for the expression of CD44 and CD62L gated on the congenic markers. **(e)** Representative flow cytometry analysis of CD8<sup>+</sup> T cells derived from bone marrow chimeras. Contour plots show CD44 and CD62L expression after gating on CD8<sup>+</sup> and indicated congenic markers.

# Supplementary Fig. 2

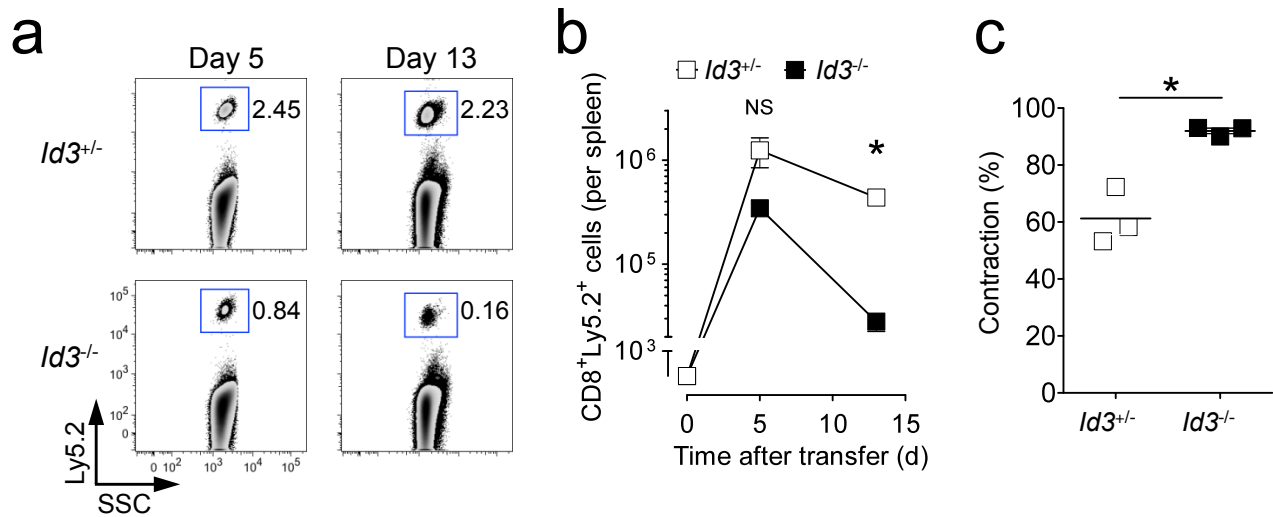

**Supplementary Figure 2. Id3 regulates the contraction of effector CD8<sup>+</sup> T cells.** (a, b) Representative flow cytometry analysis (a) and numbers (b) of Ly5.2<sup>+</sup>CD8<sup>+</sup> T cells following adoptive transfer of 5 x 10<sup>3</sup> *Id3*<sup>-/-</sup> or *Id3*<sup>+/-</sup> pmel-1 *Rag1*<sup>-/-</sup> CD8<sup>+</sup> T cells from littermates in conjunction with gp100-VV infection at indicated time points. (c) Percentage contraction of *Id3*<sup>-/-</sup> or *Id3*<sup>+/-</sup> pmel-1 *Rag1*<sup>-/-</sup> CD8<sup>+</sup> T cells relative to the peak of immune response (d5). \* = *P* < 0.01.

## Supplementary Fig. 3

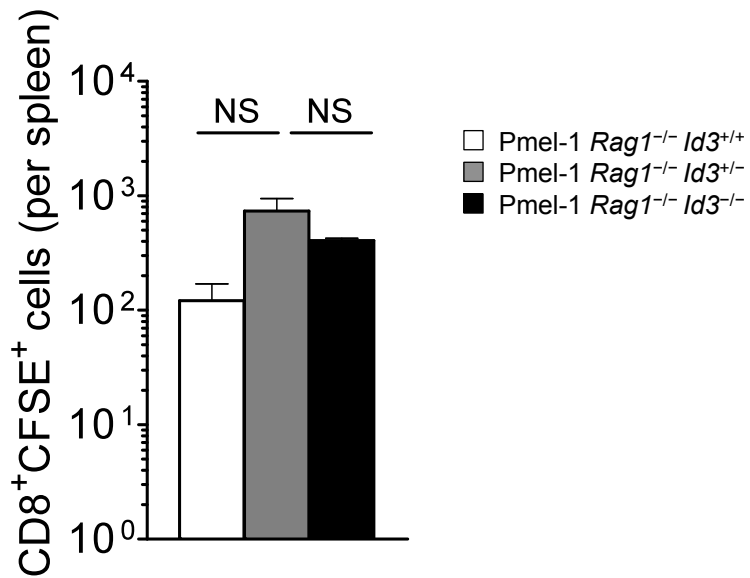

**Supplementary Figure 3. Id3 was not required for the long-term survival of naïve T cells.** Numbers of CD8<sup>+</sup>CFSE<sup>+</sup> T cells 30 days following adoptive transfer of  $9 \times 10^4$  CFSE-labeled *Id3*<sup>+/+</sup>, *Id3*<sup>+/-</sup>, or *Id3*<sup>-/-</sup> pmel-1 *Rag1*<sup>-/-</sup> CD8<sup>+</sup> T cells into WT hosts. Data are represented as mean  $\pm$  s.d.

# Supplementary Fig. 4

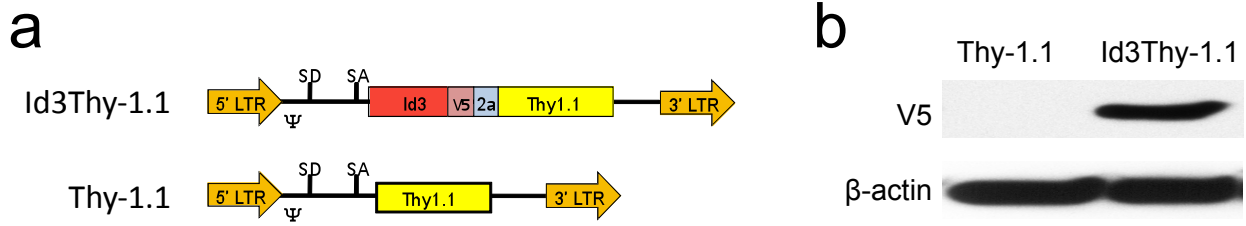

**Supplementary Figure 4. Id3Thy-1.1 retroviral vector induces constitutive expression of Id3 in CD8<sup>+</sup> T cells. (a)** Graphical representation of Id3Thy-1.1 and Thy-1.1 retro-viral constructs. **(b)** Ectopic expression levels of Id3 in Thy-1.1 and Id3Thy-1.1 pmel-1 CD8<sup>+</sup> T cells were detected by anti-V5 immunoblotting.

# Supplementary Fig. 5

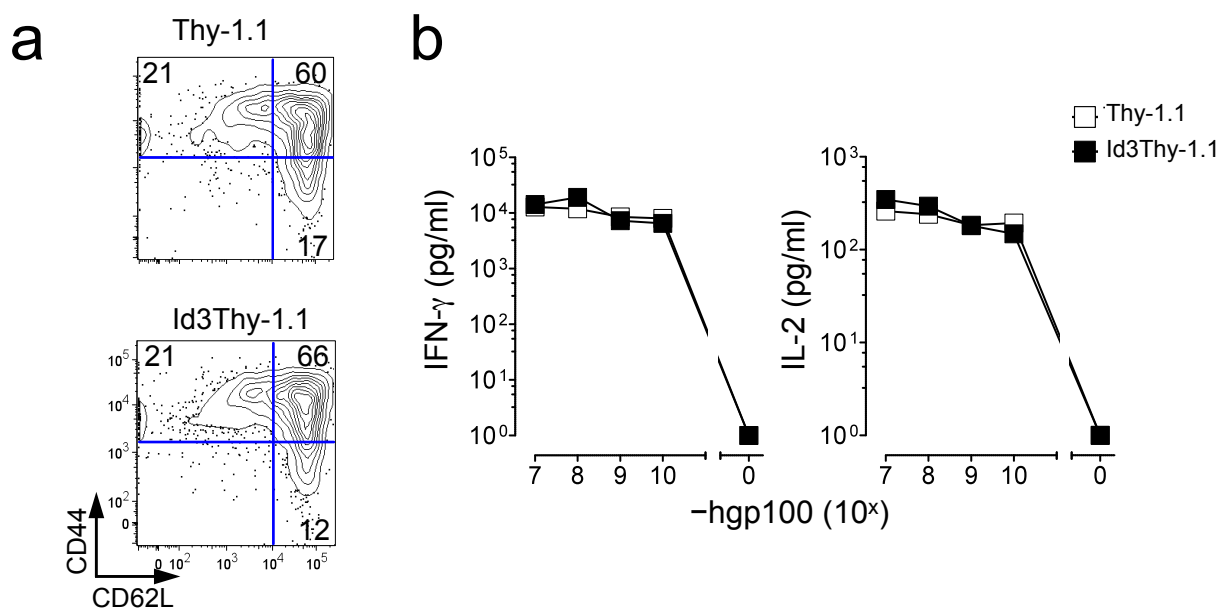

**Supplementary Figure 5. Enforced expression of Id3 does not alter phenotype and function of pmel-1 CD8<sup>+</sup> T cells prior to transfer.** (a) Representative flow cytometry analysis of Id3Thy-1.1 and Thy-1.1 pmel-1 CD8<sup>+</sup> T cells. Contour plots show CD62L and CD44 expression after gating on CD8<sup>+</sup> Thy-1.1<sup>+</sup> cells. (b) IFN- $\gamma$  (left panel) and IL-2 (right panel) release by Id3Thy-1.1 and Thy-1.1 pmel-1 CD8<sup>+</sup> T cells after 16-hour co-culture with MCA205 tumor targets pulsed with indicated concentration of hgp100 peptide. Data represented as mean  $\pm$  s.e.m. of 3 samples.

## Supplementary Fig. 6

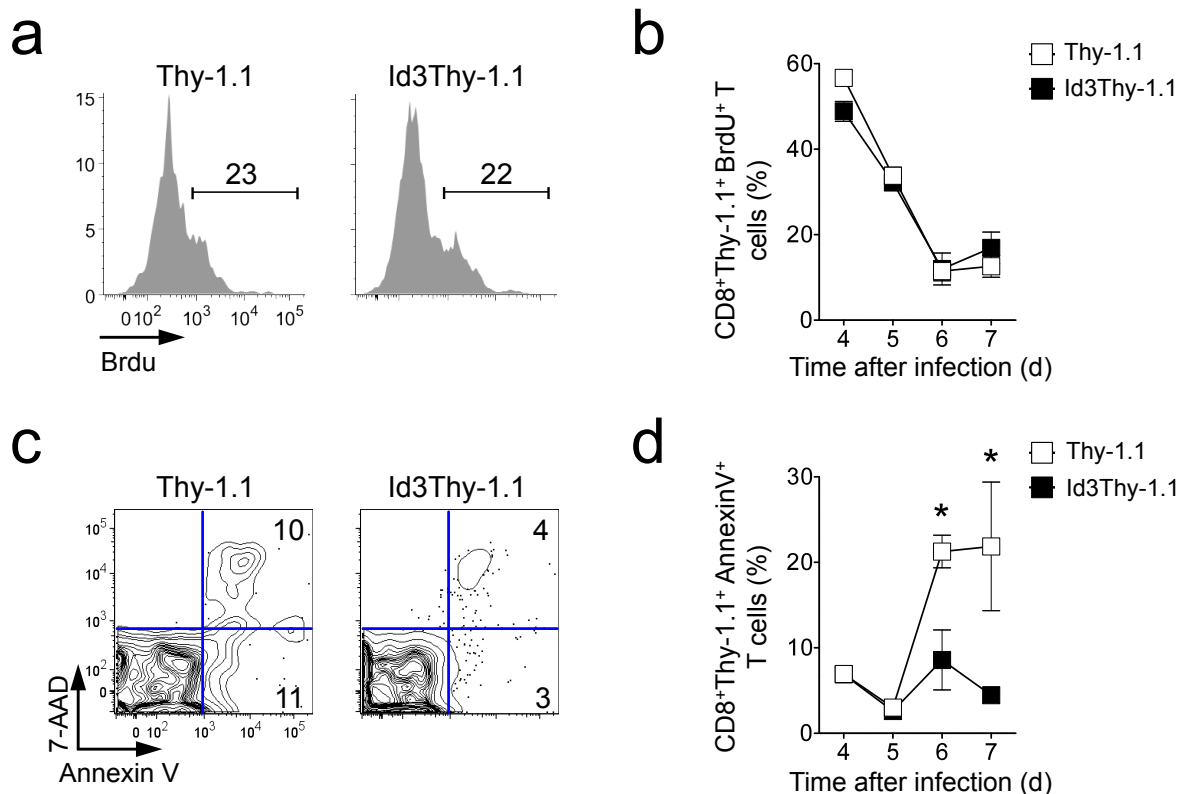

**Supplementary Figure 6. Enforced expression of Id3 enhances the survival but not the proliferation of CD8<sup>+</sup> T cells.** (a) BrdU<sup>+</sup> incorporation by adoptively transferred Id3Thy-1.1 and Thy-1.1 pmel-1 CD8<sup>+</sup> T cells 6 days after transfer and gp100-VV infection. Infected mice received 1.5 mg BrdU 16 hours before analysis of splenocytes. Representative histograms show BrdU labeling after gating on CD8<sup>+</sup>Thy-1.1<sup>+</sup> cells. (b) Percent of BrdU<sup>+</sup>CD8<sup>+</sup>Thy-1.1<sup>+</sup> T cells at indicated time-points after transferring Id3Thy-1.1 and Thy-1.1 pmel-1 CD8<sup>+</sup> T cells in conjunction with gp100-VV infection. Data are represented as mean ± s.e.m. of 3 samples. (c) Representative flow cytometry analysis of Id3Thy-1.1 and Thy-1.1 pmel-1 CD8<sup>+</sup> T cells 6 days following adoptive transfer in conjunction with gp100-VV infection. Contour plots show Annexin V and 7-AAD expression after gating on CD8<sup>+</sup>Thy-1.1<sup>+</sup> cells. (d) Percent of Annexin V<sup>+</sup>CD8<sup>+</sup>Thy-1.1<sup>+</sup> T cells at indicated time-points after transferring Id3Thy-1.1 and Thy-1.1 pmel-1 CD8<sup>+</sup> T cells in conjunction with gp100-VV infection. Data are represented as mean ± s.e.m. of 3 samples. \* =  $P < 0.05$ .

# Supplementary Fig. 7

a

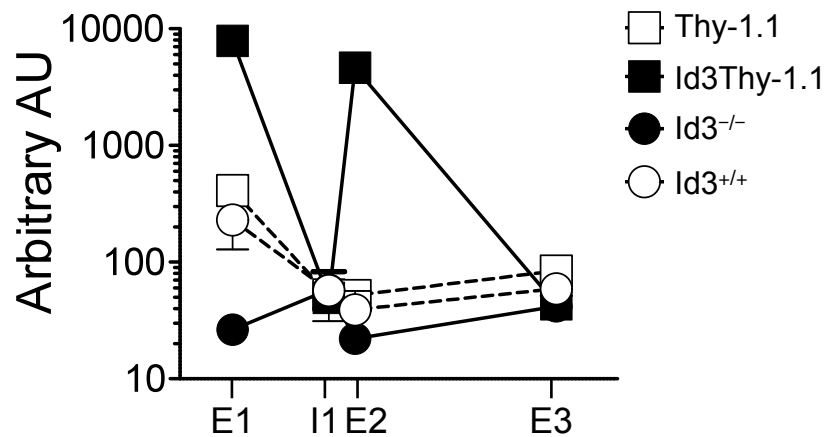

b

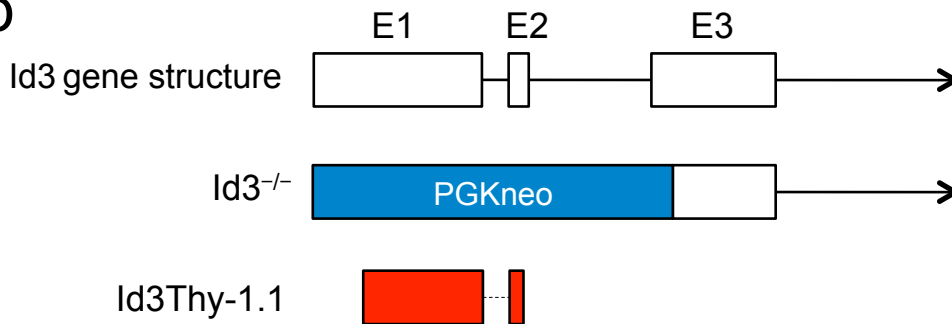

**Supplementary Figure 7. Expression of *Id3* exons and intron by WT Mouse Gene 1.0 ST arrays reflects differences in the structure of loss and gain-of-function constructs. (a)** Expression levels of exon 1, 2, 3, and intron 1 of *Id3* by WT Mouse Gene 1.0 ST arrays. **(b)** Graphical representation of *Id3* gene structure compared to the *Id3* deletion construct targeting exon 1, 2 and the first 135 bp of exon 3<sup>22</sup> and the *Id3Thy-1.1* overexpressing construct, which contains the coding region of *Id3* (the last 300 bp of exon 1 and the first 60 bp of exon 2).





# Supplementary Fig. 9

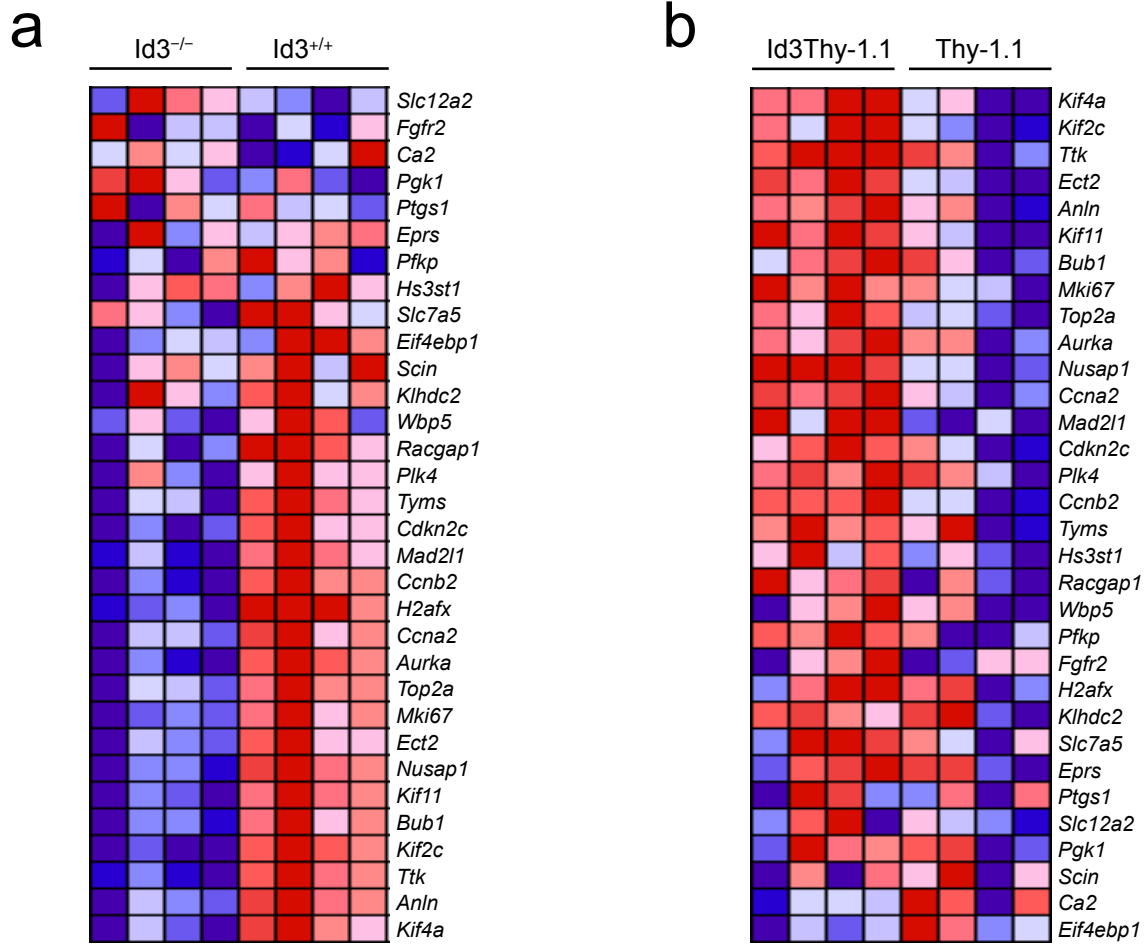

**Supplementary Figure 9. A set of genes that are found upregulated in *Tcf3* deficient cells is enriched in *Id3*<sup>+/+</sup> and *Id3Thy-1.1* cells compared to controls. (a) GSEA enrichment heat map of genes over-expressed in *Tcf3* deficient B cell lines compared to transcriptomes of *Id3*<sup>-/-</sup> or *Id3*<sup>+/+</sup> pmel-1 CD8<sup>+</sup> T cells. (b) GSEA enrichment heat map of over-expressed genes compared to transcriptomes of *Id3Thy-1.1* or *Thy-1.1* pmel-1 CD8<sup>+</sup> T cells. Red and blue indicate upregulated and downregulated genes respectively.**

# Supplementary Fig. 10

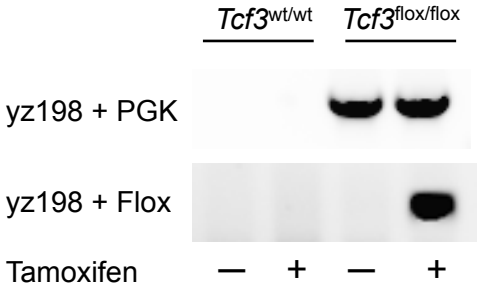

**Supplementary Figure 10. Tamoxifen induces the deletion of *Tcf3* in CD8<sup>+</sup> T cells.** PCR products of Pmel-1 *Tcf3*<sup>wt/wt</sup> Cre-ER<sup>T2</sup> and Pmel-1 *Tcf3*<sup>flox/flox</sup> Cre-ER<sup>T2</sup> CD8<sup>+</sup> T cells five days after activation in the presence of 500 nM tamoxifen or vehicle DMSO. The insertion of loxP was detected by PCR with primer pair yz198 and PGK while the deletion of loxP insertion was detected by PCR with primer pair yz198 and Flox.

## Supplementary Table 1: Genes differentially expressed in Id3<sup>high</sup> and Id3<sup>low</sup> CD8<sup>+</sup> effector T cells

| Gene Symbol          | Fold change<br>Id3 <sup>+/+</sup> vs. Id3 <sup>-/-</sup> | Fold change<br>Id3Thy-1.1 vs. Thy-1.1 |
|----------------------|----------------------------------------------------------|---------------------------------------|
| <i>Id3</i>           | 3.85251                                                  | 42.9152                               |
| <i>Foxm1</i>         | 1.88648                                                  | 1.64546                               |
| <i>Prr11</i>         | 1.70871                                                  | 1.5785                                |
| <i>Nek2</i>          | 1.78809                                                  | 1.56293                               |
| <i>Kif2c</i>         | 1.78569                                                  | 1.56269                               |
| <i>Ncapg2</i>        | 1.71622                                                  | 1.5564                                |
| <i>Dlgap5</i>        | 1.69066                                                  | 1.55271                               |
| <i>Kif4</i>          | 2.08204                                                  | 1.55253                               |
| <i>5730590G19Rik</i> | 1.53412                                                  | 1.53955                               |
| <i>Aspm</i>          | 2.25651                                                  | 1.52354                               |
| <i>Kif23</i>         | 1.57334                                                  | 1.51933                               |
| <i>Il12rb2</i>       | 2.41062                                                  | 1.5157                                |
| <i>Cdca5</i>         | 2.17632                                                  | 1.51468                               |
| <i>Kif11</i>         | 1.61491                                                  | 1.51422                               |
| <i>Chn2</i>          | 1.40237                                                  | 1.5042                                |
| <i>Ccnb1</i>         | 1.58764                                                  | 1.49421                               |
| <i>Fancd2</i>        | 1.91392                                                  | 1.48553                               |
| <i>Kif18b</i>        | 1.98318                                                  | 1.47769                               |
| <i>Pole</i>          | 1.67229                                                  | 1.46888                               |
| <i>Prc1</i>          | 1.75958                                                  | 1.463                                 |
| <i>Rrm2</i>          | 1.63077                                                  | 1.46284                               |
| <i>Cit</i>           | 1.60228                                                  | 1.46041                               |
| <i>Cenpn</i>         | 1.97648                                                  | 1.4604                                |
| <i>Pif1</i>          | 1.41821                                                  | 1.44921                               |
| <i>Nusap1</i>        | 1.78917                                                  | 1.43494                               |
| <i>Ube2c</i>         | 1.54684                                                  | 1.43455                               |
| <i>Ccnb1</i>         | 1.56456                                                  | 1.42432                               |
| <i>Esp1</i>          | 1.93267                                                  | 1.41691                               |
| <i>Smpd13b</i>       | 1.62733                                                  | 1.41657                               |
| <i>Brip1</i>         | 1.72293                                                  | 1.39648                               |
| <i>Kif20a</i>        | 1.7433                                                   | 1.39588                               |
| <i>Mki67</i>         | 1.55968                                                  | 1.39139                               |
| <i>Nuf2</i>          | 1.80399                                                  | 1.39065                               |
| <i>Aurkb</i>         | 1.57721                                                  | 1.38513                               |
| <i>Parm1</i>         | 1.61514                                                  | 1.3851                                |
| <i>Eme1</i>          | 1.4501                                                   | 1.37307                               |
| <i>Mcm3</i>          | 1.43416                                                  | 1.37072                               |
| <i>Mcm2</i>          | 1.48113                                                  | 1.3707                                |
| <i>Rrm1</i>          | 1.3998                                                   | 1.36879                               |
| <i>Top2a</i>         | 1.5453                                                   | 1.36621                               |

|                      |          |         |
|----------------------|----------|---------|
| <i>Exo1</i>          | 1.49882  | 1.34317 |
| <i>Mcm10</i>         | 1.50148  | 1.3386  |
| <i>Sgol2</i>         | 1.73674  | 1.32638 |
| <i>Ncapd2</i>        | 1.5097   | 1.31328 |
| <i>Lamc1</i>         | 1.83883  | 1.31065 |
| <i>Sord</i>          | 1.48253  | 1.30684 |
| <i>E2f7</i>          | 1.57501  | 1.3041  |
| <i>Kif14</i>         | 1.92676  | 1.30138 |
| <i>Mast2</i>         | 1.37578  | 1.30027 |
| <i>Sord</i>          | 1.44881  | 1.291   |
| <i>Ckap2l</i>        | 1.97736  | 1.28835 |
| <i>Wdr62</i>         | 1.68852  | 1.27232 |
| <i>Dna2</i>          | 1.40608  | 1.26426 |
| <i>Arhgap19</i>      | 1.86216  | 1.26309 |
| <i>Ncaph</i>         | 1.72762  | 1.26156 |
| <i>Cdk2</i>          | 1.42161  | 1.25941 |
| <i>Diap3</i>         | 1.70944  | 1.25775 |
| <i>Stmn1</i>         | 1.68983  | 1.25091 |
| <i>Incenp</i>        | 1.37516  | 1.24897 |
| <i>Plin2</i>         | 1.50337  | 1.24693 |
| <i>Hist1h2bm</i>     | 1.50415  | 1.24686 |
| <i>Hist2h2aa1</i>    | 1.40313  | 1.23866 |
| <i>Cdca8</i>         | 2.02102  | 1.23498 |
| <i>Hjrp</i>          | 1.39921  | 1.23043 |
| <i>Plk1</i>          | 1.85983  | 1.22642 |
| <i>Hmgn2</i>         | 1.39351  | 1.22637 |
| <i>Ccnb2</i>         | 1.5223   | 1.20026 |
| <i>F630043A04Rik</i> | 1.48668  | 1.19108 |
| <i>Gtse1</i>         | 1.51465  | 1.18775 |
| <i>Pik3c2b</i>       | 1.54536  | 1.18339 |
| <i>unknown</i>       | 2.35654  | 1.16945 |
| <i>Zwilch</i>        | 1.81937  | 1.15949 |
| <i>Rps6ka5</i>       | 1.47627  | 1.14756 |
| <i>Serpina3f</i>     | -2.97158 | 1.14462 |
| <i>Hist1h2bb</i>     | 1.77006  | 1.13906 |
| <i>unknown</i>       | 2.81317  | 1.13672 |
| <i>Swap70</i>        | 2.14678  | 1.12593 |
| <i>2610002D18Rik</i> | 2.50902  | 1.1113  |
| <i>Gm7609</i>        | -4.73476 | 1.10811 |
| <i>Gm10002</i>       | -4.22895 | 1.09691 |
| <i>Mfge8</i>         | 1.58426  | 1.09365 |
| <i>Igf2bp3</i>       | 2.87729  | 1.08122 |
| <i>Gm3579</i>        | 2.00555  | 1.06941 |
| <i>LOC641050</i>     | -1.79797 | 1.06313 |
| <i>Gm3579</i>        | 2.16865  | 1.05273 |
| <i>Myo1e</i>         | 2.22477  | 1.05228 |
| <i>Mid1</i>          | -2.53888 | 1.03114 |

|                |          |          |
|----------------|----------|----------|
| <i>unknown</i> | -3.93819 | 1.01597  |
| <i>Sfn</i>     | 3.23473  | 1.00646  |
| <i>Gm7609</i>  | -2.11706 | -1.00455 |
| <i>Wdtd1</i>   | -1.77842 | -1.01028 |
| <i>unknown</i> | 4.46894  | -1.02156 |
| <i>Sntb1</i>   | -2.39275 | -1.02965 |
| <i>Mela</i>    | 3.94702  | -1.03333 |
| <i>unknown</i> | -2.14921 | -1.04372 |
| <i>unknown</i> | 36.7392  | -1.05365 |
| <i>Stk39</i>   | -2.50634 | -1.05677 |
| <i>Lilrb4</i>  | -4.62989 | -1.05768 |
| <i>Ikzf2</i>   | 1.90947  | -1.06322 |
| <i>unknown</i> | -2.70401 | -1.08357 |
| <i>Rab4a</i>   | -2.67804 | -1.10268 |
| <i>Lysmd2</i>  | -1.56549 | -1.1029  |
| <i>Ppic</i>    | -3.79314 | -1.10616 |
| <i>Entpd4</i>  | -1.62954 | -1.10683 |
| <i>Naip3</i>   | -3.16492 | -1.14447 |
| <i>Cyp4v3</i>  | -1.48896 | -1.14761 |
| <i>Gas5</i>    | -1.47852 | -1.15597 |
| <i>Litaf</i>   | -1.71126 | -1.17086 |
| <i>Sytl1</i>   | -2.58675 | -1.18448 |
| <i>Dapl1</i>   | -3.07135 | -1.19001 |
| <i>Gm4841</i>  | -1.80246 | -1.19852 |
| <i>Mela</i>    | 107.167  | -1.19893 |
| <i>Aim2</i>    | -1.57383 | -1.21085 |
| <i>Cnr2</i>    | -1.69614 | -1.21198 |
| <i>Gpr25</i>   | -1.61444 | -1.21644 |
| <i>unknown</i> | -1.73344 | -1.2242  |
| <i>Tlr1</i>    | -1.4902  | -1.22989 |
| <i>Gp49a</i>   | -5.33109 | -1.2312  |
| <i>Ctla4</i>   | -1.40996 | -1.27766 |
| <i>Sh3d20</i>  | -1.43419 | -1.27954 |
| <i>Tanc2</i>   | -1.39033 | -1.29058 |
| <i>Ccr7</i>    | -1.31535 | -1.29128 |
| <i>Bmp7</i>    | -1.45961 | -1.29352 |
| <i>Eps8l1</i>  | -1.51043 | -1.29437 |
| <i>unknown</i> | -1.37162 | -1.31612 |
| <i>F2rl1</i>   | -2.1879  | -1.33099 |
| <i>Acpp</i>    | -2.08446 | -1.33502 |
| <i>unknown</i> | -1.39881 | -1.34628 |
| <i>Atp1b1</i>  | -4.57052 | -1.36184 |
| <i>unknown</i> | -1.57218 | -1.37047 |
| <i>St6gal1</i> | -1.97331 | -1.49964 |
| <i>Wfikkn2</i> | -1.31748 | -1.51688 |
| <i>Ptbp2</i>   | -1.19227 | -1.51838 |
| <i>Pdgfb</i>   | -1.5765  | -1.53815 |

|                |          |          |
|----------------|----------|----------|
| <i>Smyd1</i>   | -1.26593 | -1.70987 |
| <i>Cxcr5</i>   | -2.01828 | -1.71353 |
| <i>Slc16a5</i> | -1.43574 | -2.03152 |
| <i>Slc6a19</i> | -1.61074 | -2.19814 |

\*Genes involved in DNA replication and repair are highlighted in gray

## Supplementary Methods

**Generation of BM chimeras.** We enriched hematopoietic stem cells (HSC) obtained from femurs and tibias of pmel-1 *Rag1*<sup>-/-</sup>*Id3*<sup>-/-</sup> Thy-1.1 and pmel-1 *Rag1*<sup>-/-</sup> Thy-1.2 mice with EasySep mouse hematopoietic progenitor cell enrichment kit (Stemcell Technologies). Ly5.1 recipients were irradiated with 9 Gy and injected i.v. with  $1.2 \times 10^6$  HSC cells. We analyzed bone marrow chimeras 8 weeks after transplantation.

**Cytokine release assays.**  $2.5 \times 10^4$  MCA205 cells were pulsed with hgp100<sub>25-33</sub> or irrelevant influenza nucleoprotein peptide at indicated concentrations and incubated overnight with T cells at a 1:1 ratio at 37 °C. We analyzed the supernatants using mouse IFN- $\gamma$  and mouse IL-2 by ELISA (R&D Systems).

**BrdU/Annexin incorporation assay.** We injected mice i.p with 1.5 mg of BrdU (Sigma-Aldrich) 16 h before collecting the spleens. CD8<sup>+</sup> T cells were enriched and stained with CD8<sup>+</sup> and congenic surface makers. Annexin V/7-AAD assay and BrdU quantification were performed following the manufacturer's instruction (BD Biosciences).
